# Supplementary material
Source: ML conference proceedings conference paper supplement (https://openaccess.thecvf.com/content/WACV2024/html/Bamba_Partial_Binarization_of_WACV_2024_paper.html)
Supplement: Supplementary file 1 [file Bamba_Partial_Binarization_of_WACV_2024_supplemental.pdf]

## A. Experimental Setup

**Configuration of hyperparameters.** cResNet-20, ResNet-18 and MobileNet were trained with batch sizes of 128 at an initial learning rate of 0.1. For TinyImageNet batch sizes were reduced to 64 and initial learning rate increased to 0.2. We used stochastic gradient descent optimizer with a momentum value of 0.9 and weight decay of  $10^{-4}$ , whereas for MobileNet weight decay of  $10^{-5}$  was used. Cross Entropy Loss was used with label smoothing of 0.01. We use step learning rate strategy to decay learning rate by 0.1 after 50% and 75% of the total epochs. For CIFAR100, models were trained for 160 epochs with RandomCrop and RandomHorizontalFlip augmentations whereas for TinyImageNet the number of epochs were reduced to 120, and RandomAffine and RandomHorizontalFlip were used as augmentations. Moreover, for ImageNet, models were trained for 60 epochs with RandomResizedCrop and RandomHorizontalFlip as augmentations.

Backbone of SIAMFC was replaced by the first 3 blocks of ResNet-18. Model was trained with a batch size of 8 at an initial learning rate of  $10^{-3}$  using SGD optimizer with momentum 0.9 and weight decay  $5 \times 10^{-4}$ . We use Exponential learning rate scheduler with gamma value of 0.59 and final learning rate of  $10^{-5}$ . All experiments were trained for 50 epochs with early stopping enabled. Please refer to open-source implementation of <https://github.com/huanglianhua/siamfc-pytorch> for further details.

**Hardware and training time.** Single Nvidia V100 32GB card with 512 GB RAM and a 64-core processor was used for running all the experiments. The training time for pre-training ResNet-18 on ImageNet was 30 hours, and each subsequent run on the specified budget also took 30 hours.

## B. Iterative Selection

In iterative search strategy we identify the right layers of any given network to be converted to binary or full precision, one-by-one. This approach is described in Algorithm 1. For the  $k$  out of  $n$  layers to be binarized, the  $j^{\text{th}}$  step of binarization, where  $j \in [1, k]$ , can be stated as finding the optimal layer  $\theta^* \in \Theta_{(j)}$  to be binarized. It can be mathematically stated as follows.

---

### Algorithm 1: Iterative Selection

---

**Given** : Empty set  $\{\}$ ; Current layer chosen  $\theta_j$ ;  
 Optimal layer chosen  $\theta_j^*$ ;  
 Current objective function  $\mathcal{L}$ ; Optimal  
 objective function  $\mathcal{L}^*$ ;  
**Input** : Network weight set  $\Theta$   
**Output** : Binarized weight set  $\Phi$   
 $\Phi \leftarrow \{\}$   
**for**  $j = 1 \dots k$  **do**  
 $\mathcal{L}^* \leftarrow \infty$   
**for**  $\theta_j \in \Theta$  **do**  
 $\mathcal{L} \leftarrow$   
 ITERATIVE SELECTION( $\theta_j + \Phi, \Theta - \theta_j,$ )  
**if**  $\mathcal{L} < \mathcal{L}^*$  **then**  
 $\mathcal{L}^* \leftarrow \mathcal{L}$   
 $\theta_j^* \leftarrow \theta_j$   
**end**  
**end**  
 $\Phi \leftarrow \text{PUSH}(\theta_j^*)$   
 $\Theta \rightarrow \text{POP}(\theta_j^*)$   
**end**

---

$$\theta_{(j)}^* = \underset{\theta \in \Theta_{(j)}, \mathbf{w}}{\operatorname{argmin}} \mathcal{L}(\mathcal{F}(\theta + \Phi_{(j)}, \Theta_{(j)} - \theta, \mathbf{x}), \mathbf{y})$$

$$\text{s.t. } \mathcal{B}(\theta + \Phi_{(j)}, \Theta_{(j)} - \theta) \leq \mathcal{B}_0,$$

where  $\Theta_{(j)} = \Theta - \Phi_{(j)}$ . Here,  $\Phi_{(j)}$  denotes the layers that have already been binarized in the previous  $j - 1$  steps and is defined as  $\Phi_{(j)} = \{\theta_{(1)}^*, \theta_{(2)}^*, \dots, \theta_{(j-1)}^*\}$ , where  $\theta_j^*$  denotes the optimal layer chosen at the  $j^{\text{th}}$  step of binarization to obtain B2NN. For calculating  $\theta_j^*$ , we perform brute search over all elements of  $\Theta_{(j)}$  and choose the layer, which when binarized, maximizes the performance of the intermediate B2NN model.

## C. Broader Impact

We proposed a new paradigm to perform partial binarization wherein layers are either full precision or full binary layers. As highlighted in our experiments, it results in improved model efficiency, enhanced model compression, performance gains in image classification and object tracking, and transferability across datasets. These broader impacts contribute to advancements in efficient and accurate neural networks, enabling their deployment in various resource-constrained scenarios and application domains. Moreover, the reduced footprint of such AI systems is particularly important because the demand for AI continues to grow, and every consumption is becoming a critical concern. Further, the improved inference speed of the devices due to model compression can enhance the user experience and enable new applications in areas such as real-time object tracking, medical diagnosis, among others. Since the B2NN models are light, these also allow sensitive data to be processed

locally rather than on cloud servers. This can enhance privacy by minimizing the sharing of personal data on external servers.

This highlights the need of more research focused on layer selection and the potential need of specialized hardware which can benefit from B2NNs. Also, binarization, which is one of the strongest compression techniques, will help reduce the hardware and computation constraints which inhibit the use of larger and complex models for production. Further, as machine learning continues to grow in scale and complexity, the environmental impact of training and inference becomes increasingly significant. Model compression techniques can reduce the computational resources required for training and inference, leading to lower energy consumption and a reduced carbon footprint.

## D. Experiments: Additional Details

### D.1. Choice of activation function

Table 1. Performance of B2NNs with different activation function obtained at various FLOPs on CIFAR100 with cResNet20. FLOPs for full precision network is  $4.14 \times 10^7$ .

| Remaining<br>FLOPs (%) | Activation function |              |          |              |              |
|------------------------|---------------------|--------------|----------|--------------|--------------|
|                        | Identity            | ReLU         | HardTanh | BinReLU      | RPRReLU      |
| 100.00                 | 16.40               | <b>65.44</b> | 61.15    | 64.98        | 63.83        |
| 88.78                  | 42.72               | 54.66        | 60.64    | <b>64.53</b> | 63.89        |
| 77.57                  | 48.12               | 54.33        | 60.23    | <b>64.72</b> | 64.4         |
| 66.35                  | 50.60               | 41.23        | 59.65    | <b>64.66</b> | 63.72        |
| 52.33                  | 53.13               | 41.28        | 58.87    | <b>63.90</b> | 63.43        |
| 32.71                  | 53.68               | 29.18        | 54.00    | 61.11        | <b>61.65</b> |
| 4.67                   | 51.69               | 20.39        | 48.05    | <b>53.72</b> | 53.96        |

**BinReLU activation function.** The proposed BinReLU activation function is designed to enhance the stability of the full-precision as well as binary components of a B2NN in general. Mathematically, BinReLU can be stated as

$$f(x) = \begin{cases} -1 & \text{if } x \leq -1 \\ x & \text{otherwise} \end{cases}, \quad (1)$$

where  $x$  and  $f(x)$  denote the input and output of the activation function.

Table 1 shows the BinReLU function together with ReLU, HardTanh, RPRReLU and Identity mapping. For full-precision networks, ReLU is considered a very effective choice of activation, however, since it eliminates the activation information below 0, it does not work well for binary networks. For BNNs, either of HardTanh or Identity functions are preferred. However, both these activations do not work well for the real-valued networks (Table 1). Note that an identity

mapping works well for BNN since for such cases, nonlinearity is inherently introduced through the squashing of the activation values to -1 and 1 using  $\text{Sign}(\cdot)$ . BinReLU is inspired from the other activations stated here in a sense that it preserves the characteristics of ReLU for positive activations and keeps them real-valued, and also ensures that the activation information between -1 and 0 is preserved.

### D.2. Performance on simple classification datasets.

This section presents results obtained with `MixBin`, along with various model compression baselines, on the CIFAR-100 and TinyImageNet datasets. Baselines here include Network Slimming, HAWQ-V2, Adaptive MBQ, BNAS and random selection.

Table 3 shows performance scores for cResNet-20 for CIFAR-100. Additionally, we provide a sensitivity analysis for this setting, in which we calculate the error in accuracy by conducting three separate runs on different random seeds. Table 2 and 4 present result on TinyImageNet dataset.

### D.3. Effect of binarizing different parts of a network.

The performance of the constructed B2NN model depends heavily on the choice of  $\Phi$ . In Table 5, we compare the performance of MixBin with several trivial baselines.

Table 2. Performance scores for the MobileNetV1 architecture on TinyImageNet datasets for five compression methods: Network Slimming, HAWQ-V2, Adaptive MBQ, BNAS and MixBin (ours). The term "budget" refers to the percentage of FLOPs that remain after applying the respective compression method.

| Method                 | Budget (%) | Acc. (%) $\uparrow$ | FLOPs (%) $\downarrow$ |
|------------------------|------------|---------------------|------------------------|
| Full Precision Network | -          | 52.85               | 100                    |
| Binary Network         | -          | 34.28               | 4.67                   |
| Network Slimming       |            | 53.67               | 80                     |
| HAWQ-V2                |            | 51.86               | 81.03                  |
| Adaptive MBQ           |            | 50.43               | 81.72                  |
| BNAS                   | 80         | 51.09               | 81.20                  |
| MixBin <sub>Grad</sub> |            | 56.62               | 80.15                  |
| MixBin <sub>Loss</sub> |            | 54.26               | 77.03                  |
| Random                 |            | 50.05               | 81.32                  |
| Network Slimming       |            | 51.44               | 60                     |
| HAWQ-V2                |            | 49.82               | 61.88                  |
| Adaptive MBQ           |            | 49.69               | 61.88                  |
| BNAS                   | 60         | 49.48               | 61.88                  |
| MixBin <sub>Grad</sub> |            | 52.11               | 63.18                  |
| MixBin <sub>Loss</sub> |            | 50.75               | 61.61                  |
| Random                 |            | 49.27               | 61.88                  |
| Network Slimming       |            | 45.83               | 40                     |
| HAWQ-V2                |            | 46.10               | 41.24                  |
| Adaptive MBQ           |            | 43.03               | 41.03                  |
| BNAS                   | 40         | 46.48               | 40.08                  |
| MixBin <sub>Grad</sub> |            | 48.50               | 39.68                  |
| MixBin <sub>Loss</sub> |            | 47.69               | 38.38                  |
| Random                 |            | 42.3                | 39.45                  |
| Network Slimming       |            | 35.33               | 20                     |
| HAWQ-V2                |            | 39.31               | 21.43                  |
| Adaptive MBQ           |            | 39.73               | 9.13                   |
| BNAS                   | 20         | 42.06               | 16.71                  |
| MixBin <sub>Grad</sub> |            | 41.12               | 13.83                  |
| MixBin <sub>Loss</sub> |            | 41.12               | 13.83                  |
| Random                 |            | 38.34               | 20.31                  |

Table 3. Performance scores for the cResNet-20 architecture on CIFAR-100 datasets for five compression methods: Network Slimming, HAWQ-V2, Adaptive MBQ, BNAS and MixBin (ours). The Full precision network has a total of  $4.14 \times 10^7$  FLOPs, while the binary network generated using the Bi-RealNet method has  $1.93 \times 10^6$  FLOPs. The term "budget" refers to the percentage of FLOPs that remain after applying the respective compression method.

| Method                 | Budget (%) | Acc. (%) $\uparrow$ | FLOPs (%) $\downarrow$ | Error $\downarrow$ |
|------------------------|------------|---------------------|------------------------|--------------------|
| Full Precision Network | -          | 64.76               | 100                    | 0.48               |
| Binary Network         | -          | 53.18               | 4.67                   | 0.45               |
| Network Slimming       |            | 66.67               | 80                     | 0.48               |
| HAWQ-V2                |            | 65.90               | 77.57                  | 0.18               |
| Adaptive MBQ           |            | 65.77               | 77.57                  | 0.15               |
| BNAS                   | 80         | 65.57               | 77.57                  | 0.22               |
| MixBin <sub>Grad</sub> |            | 65.72               | 77.57                  | 0.24               |
| MixBin <sub>Loss</sub> |            | 66.01               | 77.57                  | 0.23               |
| Random                 |            | 65.03               | 80.37                  | 0.53               |
| Network Slimming       |            | 65.75               | 60                     | 0.31               |
| HAWQ-V2                |            | 65.77               | 60.75                  | 0.38               |
| Adaptive MBQ           |            | 65.70               | 60.75                  | 0.18               |
| BNAS                   | 60         | 65.61               | 60.75                  | 0.31               |
| MixBin <sub>Grad</sub> |            | 65.85               | 60.75                  | 0.19               |
| MixBin <sub>Loss</sub> |            | 65.62               | 60.75                  | 0.39               |
| Random                 |            | 65.31               | 60.75                  | 0.34               |
| Network Slimming       |            | 63.87               | 40                     | 0.14               |
| HAWQ-V2                |            | 64.97               | 38.31                  | 0.35               |
| Adaptive MBQ           |            | 61.96               | 38.31                  | 2.25               |
| BNAS                   | 40         | 61.15               | 38.31                  | 1.31               |
| MixBin <sub>Grad</sub> |            | 65.32               | 38.31                  | 0.42               |
| MixBin <sub>Loss</sub> |            | 65.36               | 38.31                  | 0.32               |
| Random                 |            | 61.11               | 43.92                  | 0.89               |
| Network Slimming       |            | 59.20               | 20                     | 0.42               |
| HAWQ-V2                |            | 62.03               | 21.49                  | 0.17               |
| Adaptive MBQ           |            | 58.46               | 18.69                  | 1.93               |
| BNAS                   | 20         | 57.59               | 21.49                  | 0.19               |
| MixBin <sub>Grad</sub> |            | 63.76               | 21.49                  | 0.47               |
| MixBin <sub>Loss</sub> |            | 63.49               | 21.49                  | 0.23               |
| Random                 |            | 58.56               | 21.49                  | 0.63               |
| Network Slimming       |            | 52.52               | 10                     | 0.39               |
| HAWQ-V2                |            | 58.41               | 13.12                  | 0.31               |
| Adaptive MBQ           |            | 56.86               | 10.28                  | 1.81               |
| BNAS                   | 10         | 57.03               | 10.28                  | 0.50               |
| MixBin <sub>Grad</sub> |            | 60.27               | 11.08                  | 0.50               |
| MixBin <sub>Loss</sub> |            | 57.54               | 10.28                  | 0.75               |
| Random                 |            | 56.47               | 10.28                  | 0.59               |

Table 4. Performance scores for the ResNet-18 architecture on TinyImageNet datasets for five compression methods: Network Slimming, HAWQ-V2, Adaptive MBQ, BNAS and MixBin (ours). The Full precision network has a total of  $5.63 \times 10^8$  FLOPs. The term "budget" refers to the percentage of FLOPs that remain after applying the respective compression method.

| Method                 | Budget (%) | Acc. (%) $\uparrow$ | FLOPs (%) $\downarrow$ |
|------------------------|------------|---------------------|------------------------|
| Full Precision Network | -          | 56.88               | 100                    |
| Binary Network         | -          | 44.43               | 4.67                   |
| Network Slimming       |            | 55.45               | 80                     |
| HAWQ-V2                |            | 57.58               | 81.25                  |
| Adaptive MBQ           |            | 57.55               | 81.25                  |
| BNAS                   | 80         | 56.99               | 81.25                  |
| MixBin <sub>Grad</sub> |            | 57.11               | 81.25                  |
| MixBin <sub>Loss</sub> |            | 57.45               | 81.25                  |
| Random                 |            | 56.89               | 81.25                  |
| Network Slimming       |            | 55.3                | 60                     |
| HAWQ-V2                |            | 56.80               | 62.50                  |
| Adaptive MBQ           |            | 56.71               | 62.50                  |
| BNAS                   | 60         | 57.06               | 62.50                  |
| MixBin <sub>Grad</sub> |            | 56.67               | 62.50                  |
| MixBin <sub>Loss</sub> |            | 57.51               | 62.50                  |
| Random                 |            | 56.6                | 62.50                  |
| Network Slimming       |            | 54.12               | 40                     |
| HAWQ-V2                |            | 55.70               | 43.76                  |
| Adaptive MBQ           |            | 56.10               | 43.76                  |
| BNAS                   | 40         | 55.71               | 43.76                  |
| MixBin <sub>Grad</sub> |            | 56.44               | 43.76                  |
| MixBin <sub>Loss</sub> |            | 56.18               | 43.76                  |
| Random                 |            | 56.0                | 40.62                  |
| Network Slimming       |            | 54.00               | 20                     |
| HAWQ-V2                |            | 54.36               | 21.88                  |
| Adaptive MBQ           |            | 54.58               | 25.01                  |
| BNAS                   | 20         | 53.69               | 21.88                  |
| MixBin <sub>Grad</sub> |            | 55.08               | 21.88                  |
| MixBin <sub>Loss</sub> |            | 54.86               | 21.88                  |
| Random                 |            | 54.25               | 24.12                  |
| Network Slimming       |            | 51.83               | 10                     |
| HAWQ-V2                |            | 53.57               | 12.51                  |
| Adaptive MBQ           |            | 53.87               | 12.51                  |
| BNAS                   | 10         | 53.43               | 12.51                  |
| MixBin <sub>Grad</sub> |            | 54.25               | 12.51                  |
| MixBin <sub>Loss</sub> |            | 54.25               | 12.51                  |
| Random                 |            | 54.02               | 10.92                  |

Table 5. Performance comparison of B2NNs obtained using MixBin vs. the various trivial approaches. The B2NNs are constructed using cResNet-20 architecture on CIFAR-100 datasets. Here, *Rear-BN* and *Front-BN* represent B2NNs constructed with binary layer placed in the rear and front parts of the network, respectively. *Pseudo-random* involves modifying 30% of the MixBin generated B2NNs. The Full Precision network and Binary Network have  $4.14 \times 10^7$  and  $1.93 \times 10^6$  FLOPs respectively.

| Method                 | Budget(%) | Acc.(%) $\uparrow$ | FLOPs(%) $\downarrow$ | Error $\downarrow$ |
|------------------------|-----------|--------------------|-----------------------|--------------------|
| Full Precision Network | -         | 64.76              | 100                   | 0.48               |
| Binary Network         | -         | 53.18              | 4.67                  | 0.45               |
| <i>Front-BN</i>        |           | 65.12              | 83.17                 | 0.52               |
| <i>Rear-BN</i>         |           | 63.51              | 83.17                 | 1.31               |
| <i>Pseudo-random</i>   | 80        | 65.18              | 83.17                 | 0.07               |
| MixBin <sub>Grad</sub> |           | 65.72              | 77.57                 | 0.24               |
| MixBin <sub>Loss</sub> |           | 66.01              | 77.57                 | 0.23               |
| <i>Front-BN</i>        |           | 64.13              | 63.54                 | 0.37               |
| <i>Rear-BN</i>         |           | 59.32              | 63.54                 | 0.02               |
| <i>Pseudo-random</i>   | 60        | 64.60              | 63.54                 | 0.22               |
| MixBin <sub>Grad</sub> |           | 65.85              | 60.75                 | 0.19               |
| MixBin <sub>Loss</sub> |           | 65.62              | 60.75                 | 0.39               |
| <i>Front-BN</i>        |           | 63.64              | 41.12                 | 0.59               |
| <i>Rear-BN</i>         |           | 57.78              | 41.12                 | 0.43               |
| <i>Pseudo-random</i>   | 40        | 64.28              | 38.31                 | 0.62               |
| MixBin <sub>Grad</sub> |           | 65.32              | 38.31                 | 0.42               |
| MixBin <sub>Loss</sub> |           | 65.36              | 38.31                 | 0.32               |
| <i>Front-BN</i>        |           | 61.79              | 21.49                 | 0.66               |
| <i>Rear-BN</i>         |           | 56.49              | 21.49                 | 0.60               |
| <i>Pseudo-random</i>   | 20        | 61.40              | 18.68                 | 0.49               |
| MixBin <sub>Grad</sub> |           | 63.76              | 21.49                 | 0.47               |
| MixBin <sub>Loss</sub> |           | 63.49              | 21.49                 | 0.23               |
| <i>Front-BN</i>        |           | 59.28              | 10.28                 | 0.41               |
| <i>Rear-BN</i>         |           | 55.91              | 10.28                 | 0.56               |
| <i>Pseudo-random</i>   | 10        | 55.28              | 10.28                 | 0.57               |
| MixBin <sub>Grad</sub> |           | 60.27              | 11.08                 | 0.50               |
| MixBin <sub>Loss</sub> |           | 57.54              | 10.28                 | 0.75               |
